# Supplementary material
Source: publisher figshare collection journal article supplement (https://acs.figshare.com/ndownloader/files/4516783)
Supplement: Supplementary file 1 [file 4516783]

## Supporting Information

### Synthesis, Biological Evaluation, and Structure–Activity Relationships for 5-[(*E*)-2-Arylethenyl]-3-isoxazolecarboxylic Acid Alkyl Ester Derivatives as Valuable Antitubercular Chemotypes.

Marco Pieroni,<sup>†</sup> Annamaria Lilienkamp,<sup>†</sup> Baojie Wan,<sup>‡</sup> Yuehong Wang,<sup>‡</sup> Scott G. Franzblau,<sup>‡</sup> and Alan P. Kozikowski<sup>\*,†</sup>

<sup>†</sup>*Drug Discovery Program, Department of Medicinal Chemistry and Pharmacognosy, University of Illinois at Chicago, 833 S. Wood St., Chicago, IL 60612,* <sup>‡</sup>*Institute for Tuberculosis Research, College of Pharmacy, University of Illinois at Chicago, 833 S. Wood St., Chicago, IL 60612*

- |                                                                    |    |
|--------------------------------------------------------------------|----|
| 1. HPLC purity determinations for the target compounds <b>6–49</b> | S2 |
| 2. Brief description of the biological assays                      | S4 |
| 3. Activity toward other microorganisms                            | S6 |

### **1. HPLC purity determinations for the target compounds 6–49**

**Method 1.** Flow rate = 1.4 mL/min; gradient elution over 20 minutes, from 30% CH<sub>3</sub>CN–H<sub>2</sub>O to 100% CH<sub>3</sub>CN with 0.05% TFA.

**Method 2.** Flow rate = 1.4 mL/min; gradient elution over 20 minutes, from 10% CH<sub>3</sub>CN–H<sub>2</sub>O to 100% CH<sub>3</sub>CN with 0.05% TFA.

**Method 3.** Flow rate = 1.4 mL/min; gradient elution over 20 minutes, from 50% CH<sub>3</sub>CN–H<sub>2</sub>O to 70% CH<sub>3</sub>CN with 0.05% TFA.

**Table 1(SI).** HPLC purity of the target compounds

| <b>Compd</b> | <b>HPLC</b>     |         |                            |            | <b>Compd</b> | <b>HPLC</b>     |         |                            |            |
|--------------|-----------------|---------|----------------------------|------------|--------------|-----------------|---------|----------------------------|------------|
|              | Gradient Method | WL (nM) | <i>t<sub>R</sub></i> (min) | Purity (%) |              | Gradient Method | WL (nM) | <i>t<sub>R</sub></i> (min) | Purity (%) |
| <b>6</b>     | 2               | 254     | 15.4                       | 98.1       | <b>28</b>    | 1               | 280     | 7.85                       | 98.4       |
| <b>7</b>     | 1               | 254     | 1.91                       | 97.9       | <b>29</b>    | 1               | 280     | 8.48                       | 97.9       |
| <b>8</b>     | 1               | 280     | 9.86                       | 97.8       | <b>30</b>    | 1               | 280     | 9.85                       | 97.9       |
| <b>9</b>     | 3               | 254     | 7.54                       | 99.1       | <b>31</b>    | 1               | 280     | 9.63                       | 99.3       |
| <b>10</b>    | 1               | 280     | 10.9                       | 99.0       | <b>32</b>    | 1               | 280     | 8.97                       | 96.7       |
| <b>11</b>    | 1               | 280     | 10.6                       | 99.7       | <b>33</b>    | 2               | 254     | 8.85                       | 97.2       |
| <b>12</b>    | 1               | 254     | 10.1                       | 98.0       | <b>34a</b>   | 1               | 280     | 9.36                       | 98.3       |
| <b>13</b>    | 1               | 280     | 11.9                       | 98.7       | <b>34b</b>   | 1               | 280     | 10.2                       | 97.7       |
| <b>14</b>    | 1               | 280     | 11.3                       | 96.9       | <b>35</b>    | 1               | 280     | 11.2                       | 99.1       |
| <b>15</b>    | 1               | 280     | 11.9                       | 98.5       | <b>36</b>    | 1               | 280     | 10.4                       | 99.0       |
| <b>16</b>    | 1               | 280     | 10.1                       | 99.8       | <b>37</b>    | 3               | 254     | 1.51                       | 99.5       |
| <b>17</b>    | 1               | 280     | 11.0                       | 99.2       | <b>38</b>    | 3               | 254     | 4.4                        | 97.2       |
| <b>18</b>    | 1               | 280     | 10.7                       | 99.4       | <b>39</b>    | 1               | 280     | 8.1                        | 100        |
| <b>19a</b>   | 2               | 254     | 13.1                       | 99.7       | <b>40</b>    | 3               | 254     | 8.5                        | 98.3       |
| <b>19b</b>   | 2               | 254     | 14.0                       | 99.2       | <b>41</b>    | 1               | 280     | 10.6                       | 99.8       |
| <b>20</b>    | 1               | 254     | 10.4                       | 97.2       | <b>42</b>    | 1               | 280     | 11.0                       | 99.4       |
| <b>21</b>    | 1               | 280     | 11.8                       | 99.2       | <b>43</b>    | 1               | 280     | 14.3                       | 99.2       |

|            |   |     |      |      |           |   |     |      |      |
|------------|---|-----|------|------|-----------|---|-----|------|------|
| <b>22</b>  | 1 | 254 | 12.5 | 98.8 | <b>44</b> | 1 | 280 | 14.1 | 99.5 |
| <b>23</b>  | 1 | 280 | 11.9 | 99.5 | <b>45</b> | 1 | 280 | 14.0 | 99.5 |
| <b>24a</b> | 1 | 280 | 8.6  | 98.2 | <b>46</b> | 1 | 280 | 6.59 | 97.9 |
| <b>24b</b> | 2 | 254 | 13.2 | 98.1 | <b>47</b> | 2 | 254 | 13.6 | 95.3 |
| <b>25</b>  | 1 | 280 | 11.8 | 99.5 | <b>48</b> | 2 | 254 | 13.9 | 99.1 |
| <b>26</b>  | 1 | 280 | 10.2 | 99.5 | <b>49</b> | 1 | 280 | 11.5 | 99.6 |
| <b>27</b>  | 1 | 280 | 3.09 | 98.5 |           |   |     |      |      |

## **2. Brief description of the biological assays**

**Microplate Alamar Blue assay (MABA).** Briefly, the test compound MICs against *Mtb* H<sub>37</sub>RV (ATCC# 27294) were assessed by the MABA using rifampin, isoniazid and moxifloxacin as positive controls. Compound stock solutions were prepared in DMSO at a concentration of 12.8 mM, and the final test concentrations ranged from 128  $\mu$ M to 0.5  $\mu$ M. Two fold dilutions of compounds were prepared in Middlebrook 7H12 medium (7H9 broth containing 0.1% w/v casitone, 5.6  $\mu$ g/mL palmitic acid, 5 mg/mL bovine serum albumin, 4 mg/mL catalase, filter-sterilized) in a volume of 100  $\mu$ L in 96-well microplates (BD Optilux™, 96-well Microplates, black/clear flat bottom). TB cultures (100  $\mu$ L inoculum of  $2 \times 10^5$  cfu/mL) was added, yielding a final testing volume of 200  $\mu$ L. The plates were incubated at 37 °C. On the seventh day of incubation 12.5  $\mu$ L of 20% Tween 80, and 20  $\mu$ L of Alamar Blue (Invitrogen BioSource™) were added to the wells of test plate. After incubation at 37 °C for 16-24 h, fluorescence of the wells was measured (ex 530, em 590 nm). The MICs were defined as the lowest concentration effecting a reduction in fluorescence of  $\geq 90\%$  relative to the mean of replicate bacteria-only controls.

**Low-oxygen recovery assay (LORA).** Briefly, a low-oxygen adapted culture of recombinant H<sub>37</sub>Rv (pFCA-luxAB), expressing a *Vibrio harveyi* luciferase gene with an acetamidase promoter, was grown in a BiostatQ fermentor. Cells were collected on ice, washed in PBS, and stored at -80 °C. Circa  $10^5$  cfu/mL of thawed NRP cells were exposed to 2-fold serial dilutions of test compound in 7H9 broth in black 96-well plates, which were incubated 10 days anaerobically at 37 °C. Luminescence readings were obtained following a 28 h recovery in an aerobic environment (5% CO<sub>2</sub>). The data were analyzed graphically, and the lowest concentration of test compound preventing metabolic recovery (90% reduction relative to untreated cultures) was determined as described previously.

**Cytotoxicity assay.** Cytotoxicity was determined by exposing different concentrations of samples to Vero cells. Samples were dissolved at 12.8 mM in DMSO. Geometric three-fold dilutions were performed in growth medium MEM (Gibco, Grand Island, NY), containing 10%

fetal bovine serum (HyClone, Logan, UT), 25 mM *N*-(2-hydroxyethyl)-piperazine-*N'*-2-ethanesulfonic acid (HEPES, Gibco), 0.2% NaHCO<sub>3</sub> (Gibco), and 2 mM glutamine (Irvine Scientific, Santa Ana, CA). Final DMSO concentrations did not exceed 1% v/v. Drug dilutions were distributed in duplicate in 96-well tissue culture plates (Becton Dickinson Labware, Lincoln Park, NJ) at a volume of 50  $\mu$ L per well. An equal volume containing either  $5 \times 10^5$  log phase Vero cells (CCL-81; American Type Culture Collection, Rockville, MD) was added to each well and the cultures were incubated at 37 °C in an atmosphere containing 5% of CO<sub>2</sub>. After 72 h, cell viability was measured using the CellTiter 96 aqueous non-radioactive cell proliferation assay (Promega Corp., Madison, WI) according to the manufacturer's instructions. Absorbance at 490 nm was read in a Victor<sup>2</sup> multilabel reader (PerkinElmer). The IC<sub>50</sub>s were determined using a curve-fitting program.

### 3. Activity toward other microorganisms

**Table 2(SI).** MICs of selected compounds toward selected microorganisms

| Compd     | <i>S. aureus</i> | <i>E. Coli</i> | <i>C. albicans</i> | <i>M. smegmatis</i> |
|-----------|------------------|----------------|--------------------|---------------------|
|           | MIC (μM)         |                |                    |                     |
| <b>9</b>  | > 100            | > 100          | > 100              | > 100               |
| <b>30</b> | > 100            | > 100          | > 100              | 94.4                |
